# Supplementary material for: A Bibliometric and Visualized Analysis of Cardiac Regeneration Over a 20-Year Period
Source: PubMed Central journal article supplement (PMC8710530; doi:10.3389/fcvm.2021.789503), 2021-12-13
Supplement: Data_Sheet_1.pdf [file Data_Sheet_1.pdf]

## Supplementary Material

### Supplementary Figures

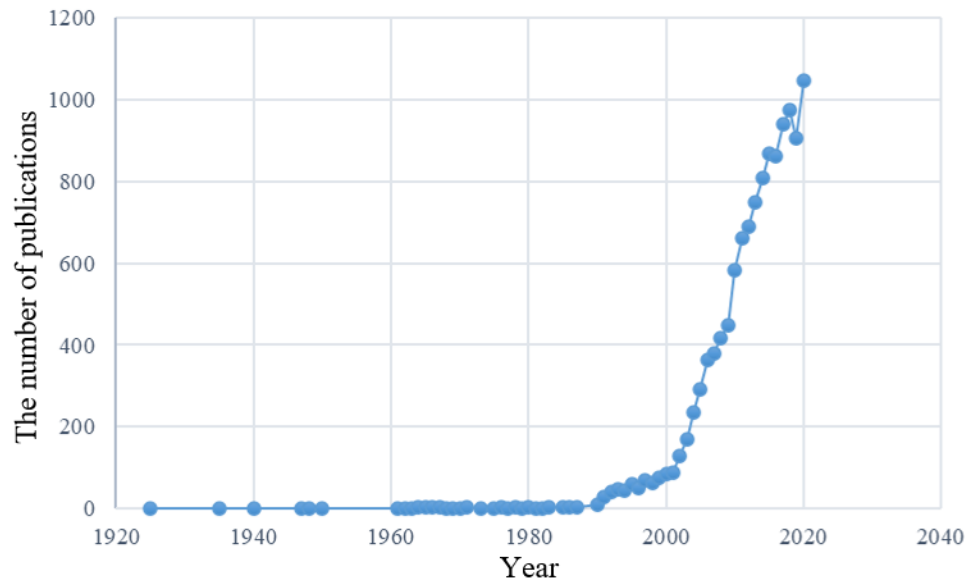

**Supplementary Figure1** The annual number of publications worldwide from 1920-2020.

### Supplementary Tables

**Supplementary Table 1.** The top 5 papers in cluster #1, 3, 5,7, 12, and 13

| Cluster | Citation | Author      | Publication year | Title                                                                               | Journal             | DOI                        |
|---------|----------|-------------|------------------|-------------------------------------------------------------------------------------|---------------------|----------------------------|
| 1       | 344      | Senyo SE    | 2013             | Mammalian heart renewal by pre-existing cardiomyocytes                              | Nature              | 10.1038/nature11682        |
| 1       | 184      | Porrello ER | 2013             | Regulation of neonatal and adult mammalian heart regeneration by the miR-15 family. | P Natl Acad Sci Usa | 10.1073/pnas.1208863110    |
| 1       | 184      | Bergmann O  | 2015             | Dynamics of Cell Generation and Turnover in the Human Heart.                        | Cell                | 10.1016/j.cell.2015.05.026 |

|   |     |              |      |                                                                                                                                                  |               |                               |
|---|-----|--------------|------|--------------------------------------------------------------------------------------------------------------------------------------------------|---------------|-------------------------------|
| 1 | 166 | Duva G       | 2015 | ERBB2 triggers mammalian heart regeneration by promoting cardiomyocyte dedifferentiation and proliferation.                                      | Nat Cell Biol | 10.1038/ncb3149               |
| 1 | 165 | Aurora AB    | 2014 | Macrophages are required for neonatal heart regeneration.                                                                                        | J Clin Invest | 10.1172/JCI72181              |
| 3 | 280 | Chong JJH    | 2014 | Human embryonic-stem-cell-derived cardiomyocytes regenerate non-human primate hearts                                                             | Nature        | 10.1038/nature13233           |
| 3 | 118 | Burridge PW  | 2014 | Chemically defined generation of human cardiomyocytes.                                                                                           | Nat Methods   | 10.1038/nmeth.2999            |
| 3 | 116 | Shiba Y      | 2016 | Allogeneic transplantation of iPS cell-derived cardiomyocytes regenerates primate hearts.                                                        | Nature        | 10.1038/nature19815           |
| 3 | 116 | Menasche P   | 2015 | Human embryonic stem cell-derived cardiac progenitors for severe heart failure treatment: first clinical case report                             | Eur Heart J   | 10.1093/eurheartj/ehv189      |
| 3 | 113 | Yang XL      | 2014 | Engineering adolescence: maturation of human pluripotent stem cell-derived cardiomyocytes                                                        | Circ Res      | 10.1161/CIRCRESAHA.14.300558  |
| 5 | 462 | Makkar RR    | 2012 | Intracoronary cardiosphere-derived cells for heart regeneration after myocardial infarction (CADUCEUS): a prospective, randomised phase 1 trial. | Lancet        | 10.1038/nbt1327               |
| 5 | 418 | Bolli R      | 2011 | Cardiac stem cells in patients with ischaemic cardiomyopathy (SCIPIO): initial results of a randomised phase 1 trial.                            | Lancet        | 10.1016/S0140-6736(12)60195-0 |
| 5 | 266 | Van Berlo JH | 2014 | c-kit <sup>+</sup> cells minimally contribute cardiomyocytes to the heart                                                                        | Nature        | 10.1016/S0140-6736(11)61590-0 |
| 5 | 220 | Smith RR     | 2007 | Regenerative potential of cardiosphere-derived cells expanded from                                                                               | Circulation   | 10.1038/nature13309           |

percutaneous endomyocardial biopsy  
specimens

|    |     |                 |      |                                                                                                                                                                                                    |                     |                                       |
|----|-----|-----------------|------|----------------------------------------------------------------------------------------------------------------------------------------------------------------------------------------------------|---------------------|---------------------------------------|
| 5  | 212 | Bearzi C        | 2007 | Human cardiac stem cells                                                                                                                                                                           | P Natl Acad Sci Usa | 10.1161/CIRCULATION<br>AHA.106.655209 |
| 7  | 177 | Menasche P      | 2008 | The Myoblast Autologous Grafting in Ischemic Cardiomyopathy (MAGIC) trial: first randomized placebo-controlled study of myoblast transplantation                                                   | Circulation         | 10.1161/CIRCULATION<br>AHA.107.734103 |
| 7  | 176 | Hare JM         | 2012 | Comparison of allogeneic vs autologous bone marrow–derived mesenchymal stem cells delivered by transendocardial injection in patients with ischemic cardiomyopathy: the POSEIDON randomized trial. | JAMA                | 10.1001/jama.2012.25321               |
| 7  | 168 | Hare JM         | 2009 | A randomized, double-blind, placebo-controlled, dose-escalation study of intravenous adult human mesenchymal stem cells (prochymal) after acute myocardial infarction.                             | J Am Coll Cardiol   | 10.1016/j.jacc.2009.06.055            |
| 7  | 162 | Hatzistergos KE | 2010 | Bone marrow mesenchymal stem cells stimulate cardiac stem cell proliferation and differentiation.                                                                                                  | Circ Res            | 10.1161/CIRCRESAHA.1<br>10.222703     |
| 7  | 146 | Sanganalmath SK | 2013 | Cell therapy for heart failure: a comprehensive overview of experimental and clinical studies, current challenges, and future directions                                                           | Circ Res            | 10.1161/CIRCRESAHA.1<br>13.300219     |
| 12 | 145 | Ibrahim AGE     | 2014 | Exosomes as critical agents of cardiac regeneration triggered by cell therapy                                                                                                                      | Stem Cell Reports   | 10.1016/j.stemcr.2014.04.<br>006      |
| 12 | 115 | Khan M          | 2015 | Embryonic stem cell-derived exosomes promote endogenous repair mechanisms and enhance cardiac function following myocardial infarction                                                             | Circ Res            | 10.1161/CIRCRESAHA.1<br>17.305990     |
| 12 | 113 | Barile L        | 2014 | Extracellular vesicles from human cardiac progenitor cells inhibit cardiomyocyte apoptosis and improve                                                                                             | Cardiovasc Res      | 10.1093/cvr                           |

## cardiac function after myocardial infarction

|    |     |          |      |                                                                                                                                                                         |                   |                               |
|----|-----|----------|------|-------------------------------------------------------------------------------------------------------------------------------------------------------------------------|-------------------|-------------------------------|
| 12 | 84  | Gallet R | 2017 | Exosomes secreted by cardiosphere-derived cells reduce scarring, attenuate adverse remodelling, and improve function in acute and chronic porcine myocardial infarction | Eur Heart J       | 10.1093/eurheartj/ehw240      |
| 12 | 69  | Gray WD  | 2015 | Identification of therapeutic covariant microRNA clusters in hypoxia-treated cardiac progenitor cell exosomes using systems biology                                     | Circ Res          | 10.1161/CIRCRESAHA.116.304360 |
| 13 | 268 | 268      | 2012 | In vivo reprogramming of murine cardiac fibroblasts into induced cardiomyocytes                                                                                         | Nature            | 10.1038/nature11044           |
| 13 | 252 | 252      | 2010 | Direct reprogramming of fibroblasts into functional cardiomyocytes by defined factors                                                                                   | Cell              | 10.1016/j.cell.2010.07.002    |
| 13 | 238 | 238      | 2012 | Heart repair by reprogramming non-myocytes with cardiac transcription factors                                                                                           | Nature            | 10.1038/nature11139           |
| 13 | 176 | 176      | 2012 | MicroRNA-mediated in vitro and in vivo direct reprogramming of cardiac fibroblasts to cardiomyocytes                                                                    | Circ Res          | 10.1161/CIRCRESAHA.112.269035 |
| 13 | 122 | 122      | 2013 | Reprogramming of human fibroblasts toward a cardiac fate                                                                                                                | J Am Coll Cardiol | 10.1016/j.jacc.2011.05.013    |

**Supplementary Table 2. The top 5 papers that cited the members of cluster #1, 3, 5, 7, 12, 13**

| Cluster | Coverage | Author      | Year | Citing paper title                                                                                                 | Journal              | DOI                           |
|---------|----------|-------------|------|--------------------------------------------------------------------------------------------------------------------|----------------------|-------------------------------|
| 1       | 49       | Hashimoto H | 2018 | Therapeutic approaches for cardiac regeneration and repair.                                                        | Nat Rev Cardiol      | 10.1038/s41569-018-0036-6     |
| 1       | 47       | Foglia MJ   | 2016 | Building and re-building the heart by cardiomyocyte proliferation.                                                 | Development          | 10.1242/dev.132910            |
| 1       | 46       | Lin ZQ      | 2014 | Strategies for cardiac regeneration and repair                                                                     | Sci Trans med        | 10.1126/scitranslmed.3006681  |
| 1       | 46       | Galdos FX   | 2017 | Cardiac regeneration lessons from development                                                                      | Circ Res             | 10.1161/CIRCRESAHA.116.309040 |
| 1       | 45       | Karra R     | 2017 | Redirecting cardiac growth mechanisms for therapeutic regeneration.                                                | J Clin Invest        | 10.1172/JCI89786              |
| 3       | 51       | Mueller P   | 2018 | Stem cell therapy in heart diseases-cell types, mechanism and improvement strategies                               | Cell Physiol Biochem | 10.1159/000492704             |
| 3       | 37       | Ebert AD    | 2015 | Reprogramming and transdifferentiation for cardiovascular development and regenerative medicine where do we stand? | EMBO Mol Med         | 10.15252/emmm.201504395       |
| 3       | 36       | Banerjee MN | 2018 | Clinical studies of cell therapy in cardiovascular medicine recent development and future direction                | Circ Res             | 10.1161/CIRCRESAHA.118.311217 |

Supplementary Material

|    |    |             |      |                                                                                                     |                                 |                                       |
|----|----|-------------|------|-----------------------------------------------------------------------------------------------------|---------------------------------|---------------------------------------|
| 3  | 32 | Montero P   | 2020 | Cell, materials, and fabrication processes for cardiac tissue engineering                           | Front Bioeng Biotech            | 10.3389/fbioe.2020.00955              |
| 3  | 31 | Barreto S   | 2019 | Cardiac progenitor cells from stem cells: learning from genetics and biomaterials                   | Cells                           | 10.3390/cells8121536                  |
| 5  | 51 | Akhmedov AT | 2013 | Myocardial regeneration of the failing heart                                                        | Heart Fail Rev                  | 10.1007/s10741-012-9348-5             |
| 5  | 44 | Davis DR    | 2011 | Autologous cell therapy for cardiac repair                                                          | Expert Opin Biol Ther           | 10.1517/14712598.2011.556615          |
| 5  | 39 | Kikuchi K   | 2012 | Cardiac regenerative capacity and mechanisms                                                        | Annu Rev Cell Dev Biol          | 10.1146/annurev-cellbio-101011-155739 |
| 5  | 36 | Malliaras K | 2011 | Cardiac cell therapy where we've been, where we are, and where we should be headed                  | Br Med Bull                     | 10.1093/bmb/ldr018                    |
| 5  | 35 | Doppler SA  | 2013 | Cardiac regeneration: current therapies-future concepts                                             | J Thorac Dis                    | 10.3978/j.issn.2072-1439.2013.08.71   |
| 7  | 32 | Banerjee MN | 2018 | Clinical studies of cell therapy in cardiovascular medicine recent development and future direction | Circ Res                        | 10.1161/CIRCRESAHA.118.311217         |
| 7  | 31 | Akhmedov AT | 2013 | Myocardial regeneration of the failing heart                                                        | Heart Fail Rev                  | 10.1007/s10741-012-9348-5             |
| 7  | 28 | Ghiroldi A  | 2017 | Regenerating the human heart: direct reprogramming strategies and their current limitation          | Basic Res Cardiol               | 10.1007/s00395-017-0655-9             |
| 7  | 28 | Di salvo TG | 2015 | Evolving targeted therapies for right ventricular failure                                           | Expert Opin Biol Ther           | 10.1517/14712598.2015.1054277         |
| 7  | 27 | Davis DR    | 2011 | Autologous cell therapy for cardiac repair                                                          | Expert Opin Biol Ther           | 10.1517/14712598.2011.556615          |
| 12 | 24 | Alibhai FJ  | 2018 | Emerging role of extracellular vesicles in cardiac repair and rejuvenation                          | Am J Physiol Heart Circ Physiol | 10.1152/ajpheart.0100.2018            |

|    |    |              |      |                                                                                                                               |                      |                               |
|----|----|--------------|------|-------------------------------------------------------------------------------------------------------------------------------|----------------------|-------------------------------|
| 12 | 21 | Bollini S    | 2018 | Triggering endogenous cardiac repair and regeneration via extracellular vesicle-mediated communication                        | Front Physiol        | 10.3389/fphys.2018.01497      |
| 12 | 19 | Yuan Y       | 2018 | Stem cell-derived exosome in cardiovascular diseases: macro roles of micro particles                                          | Front Pharmacol      | 10.3389/fphar.2018.00547      |
| 12 | 18 | Bei Y        | 2017 | Extracellular vesicles in cardiovascular theranostics                                                                         | Theranostics         | 10.7150/thno.21274            |
| 12 | 18 | Dougherty JA | 2017 | Potential role of exosomes in mending a broken heart nanoshuttles propelling future clinical therapeutics forward             | Stem Cells Int       | 10.1155/2017/5785436          |
| 13 | 27 | Sadahiro T   | 2015 | Direct cardiac reprogramming progress and challenges in basic biology and clinical applications                               | Circ Res             | 10.1161/CIRCRESAHA.116.305374 |
| 13 | 27 | Ebrahimi B   | 2017 | In vivo reprogramming for heart regeneration: a glance at efficiency, environmental impacts, challenges and future directions | J Mol Cell Cardiol   | 10.1016/j.yjmcc.2017.05.005   |
| 13 | 26 | Kojima H     | 2017 | Discovery and progress of direct cardiac reprogramming                                                                        | Cell Mol Life Sci    | 10.1007/s00018-017-2466-4     |
| 13 | 24 | Ghiroldi A   | 2017 | Regenerating the human heart direct cardiac reprogramming strategies and their current limitations                            | Basic Res Cardiol    | 10.1007/s00395-017-0655-9     |
| 13 | 23 | Haginiwa S   | 2017 | Direct cardiac reprogramming                                                                                                  | Cardiac regeneration | 10.1007/978-3-319-56106-6_6   |
| 13 | 23 | Doppler SA   | 2015 | Direct cardiac reprogramming-the future of cardiac regeneration                                                               | Int J Mol Sci        | 10.3390/ijms160817368         |
| 13 | 23 | Batty JA     | 2017 | Direct cellular reprogramming for cardiac repair and regeneration                                                             | Eur J Heart Fail     | 10.1002/ejhf.446              |
